# Supplementary material for: Superwetting Ag@Cu2O anchored copper mesh for efficient oil/water separation and visible-light driven removal of organic pollutants
Source: Royal Society of Chemistry journal article supplement (doi:10.1039/d4nj01981d), 2024-01-01
Supplement: d4nj01981d1.pdf [file d4nj01981d1.pdf]

## *Supporting Information*

for

### **Superwetting Ag@Cu<sub>2</sub>O anchored copper mesh for efficient oil/water separation and visible-light driven removal of organic pollutants**

Jianchao Zhao<sup>a</sup>, Zhengqiang Yang<sup>a</sup>, Na Liu<sup>b,\*</sup>, Rui Wang<sup>a</sup>, Siqi Deng<sup>a</sup>, Haijie Cao<sup>a,\*</sup>

<sup>a</sup>Institute of Materials for Energy and Environment, College of Materials Science and Engineering, Qingdao University, Qingdao, PR China

<sup>b</sup>Engineering Research Center of Advanced Rare Earth Materials (Ministry of Education), Department of Chemistry, Tsinghua University, PR China

---

\*Corresponding authors.

E-mail: caohj@qdu.edu.cn (H. Cao); liun12@tsinghua.org.cn (N. Liu).

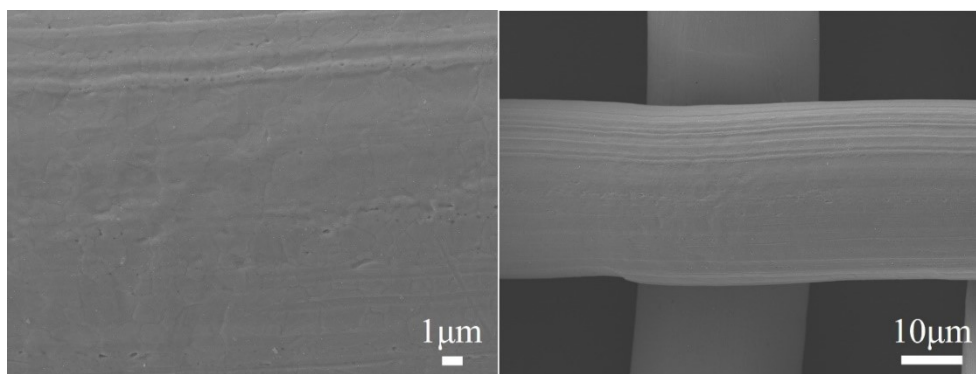

**Fig. S1.** SEM of commercial raw copper mesh.

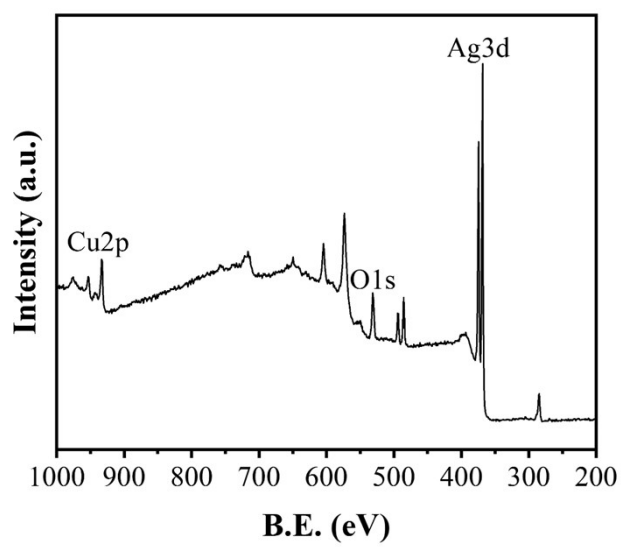

**Fig. S2.** XPS spectra of Ag@Cu<sub>2</sub>O mesh

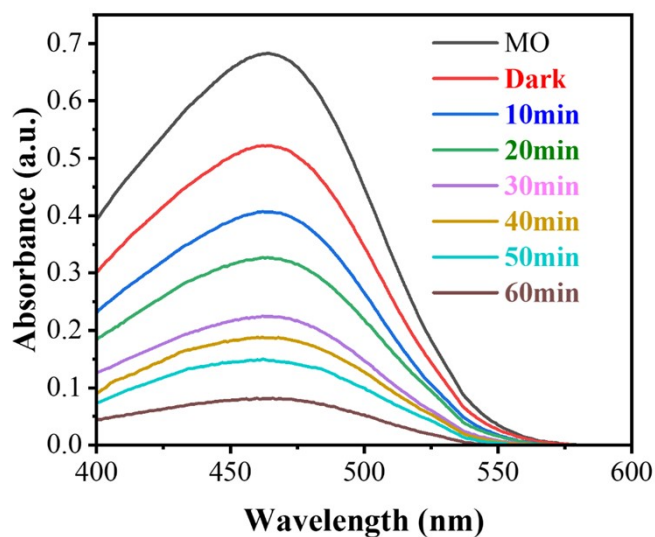

**Fig. S3.** UV-VIS absorption spectrum of methyl orange solution.

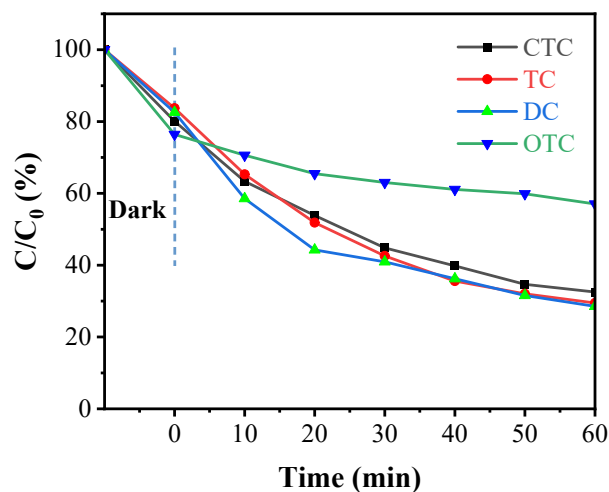

**Fig. S4.** Catalytic degradation efficiency of  $\text{Cu}_2\text{O}$  mesh for four tetracycline antibiotics.

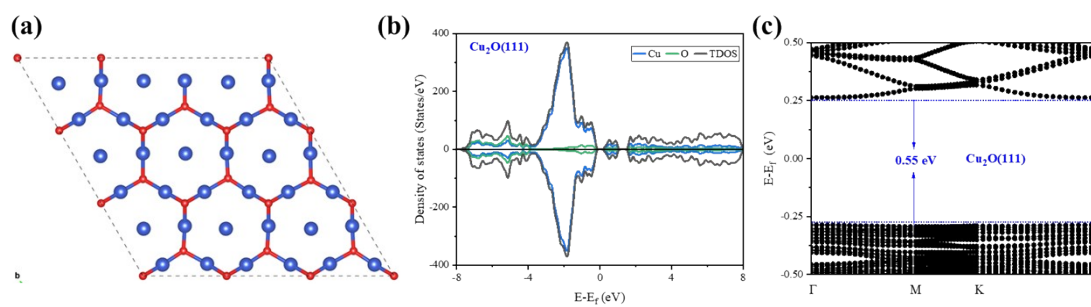

**Fig. S5.** Properties of  $\text{Cu}_2\text{O}(111)$ : (a) geometry structure, (b) partial and total density of states distribution, and (c) band structure.
